# Supplementary material for: Synthesis of Functional Silver Nanoparticles and Microparticles with Modifiers and Evaluation of Their Antimicrobial, Anticancer, and Antioxidant Activity
Source: MDPI journal article supplement (doi:10.3390/jfb11040076), 2020-10-23
Supplement: s1 [file s1]

Supplementary Material

## Synthesis of Functional Silver Nanoparticles and Microparticles with Modifiers and Evaluation of Their Antimicrobial, Anticancer, and Antioxidant Activity

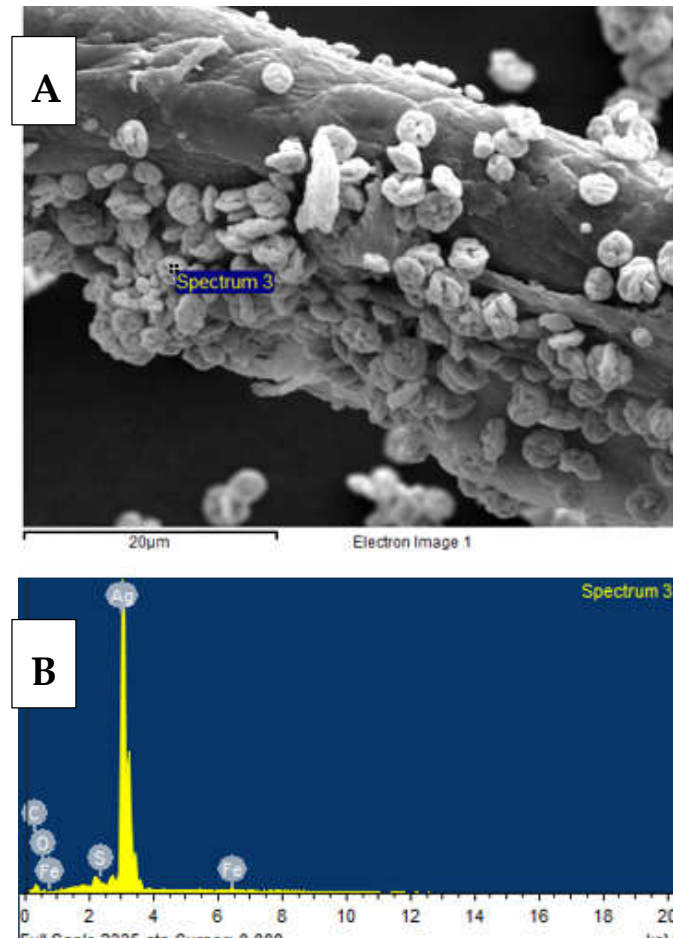

**Figure S1.** Scanning electron microscope (SEM) image showing target (A) of energy dispersive X-Ray spectroscopy (EDS) spectra of uncapped silver microparticles (AgMPs) with (B).

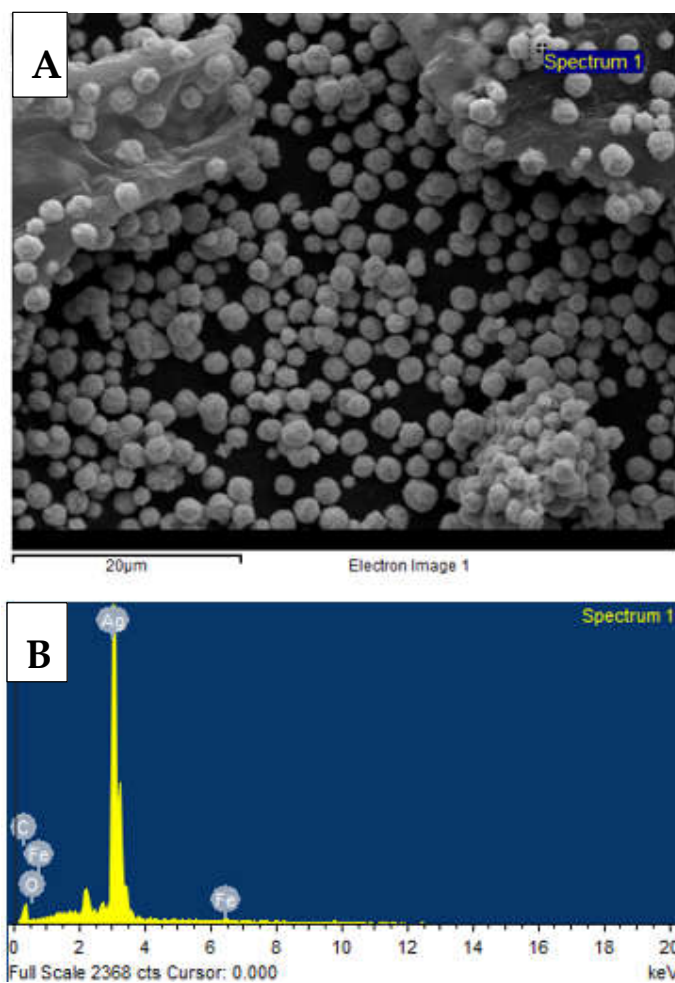

**Figure S2.** Scanning electron microscope (SEM) image showing target (A) of energy dispersive X-Ray spectroscopy (EDS) spectra of maleic acid capped silver nanoparticles (AgNPs) (B).

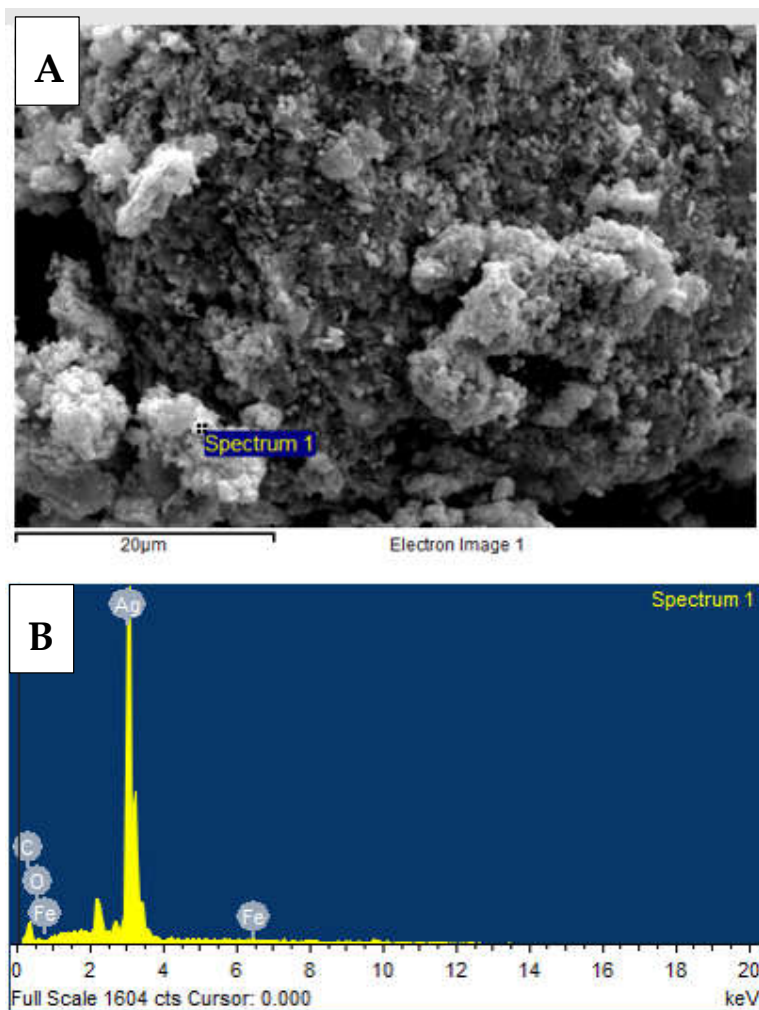

**Figure S3.** Scanning electron microscope (SEM) image showing target (A) of energy dispersive X-Ray spectroscopy (EDS) spectra of citric acid capped silver microparticles (AgMPs) (B).
